# Supplementary material
Source: PubMed Central journal article supplement (PMC3148428)

## Supporting Information (SI)

### Synthesis and characterization of Bodipy-FL-Tasigna<sup>®</sup> and its intermediates:

**General Methods.** All air or moisture sensitive reactions were performed under positive pressure of nitrogen with oven-dried glassware. Anhydrous solvents such as tetrahydrofuran (THF), toluene, dichloromethane, *N,N*-dimethylformamide (DMF), acetonitrile, methanol and triethylamine were obtained by purchasing from Sigma-Aldrich. Preparative purification was performed on a Waters semi-preparative HPLC. The column used was a Phenomenex Luna C18 (5 micron, 30 x 75 mm) at a flow rate of 45 mL/min. Method A: The mobile phase consisted of acetonitrile and water (each containing 0.1% trifluoroacetic acid). A gradient of 10% to 50% acetonitrile over 8 minutes was used during the purification. Method B: The mobile phase consisted of water (0.1% ammonium hydroxide) and acetonitrile. A gradient of 20% to 70% acetonitrile over 8 minutes was used during the purification. Fraction collection for both methods was triggered by UV detection (220 nm). Analytical analysis and purity determination were performed on an Agilent LC/MS (Agilent Technologies, Santa Clara, CA). A 7 minute gradient of 4% to 100% Acetonitrile (containing 0.025% trifluoroacetic acid) in water (containing 0.05% trifluoroacetic acid) was used with an 8 minute run time at a flow rate of 1 mL/min. A Phenomenex Luna C18 column (3 micron, 3 x 75 mm) was used at a temperature of 50°C. Mass determination was performed using an Agilent 6130 mass spectrometer with electrospray ionization in the positive mode. <sup>1</sup>H NMR spectra were recorded on Varian 400 MHz spectrometers. Chemical Shifts are reported in ppm with residual CHCl<sub>3</sub> (7.27 ppm) as internal standard for CDCl<sub>3</sub> solutions or residual DMSO-h<sub>6</sub> (2.50 ppm) for DMSO-d<sub>6</sub> solutions. All of the analogs for assay have purity

greater than 95% based on both analytical methods. High resolution mass spectrometry was recorded on Agilent 6210 Time-of-Flight LC/MS system. Confirmation of molecular formula was accomplished using electrospray ionization in the positive mode with the Agilent Masshunter software (version B.02).

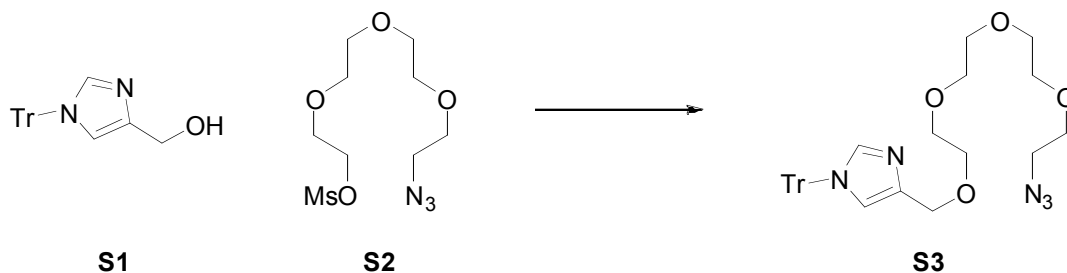

To a solution of (1-trityl-1H-imidazol-4-yl)methanol (**S1**, 10 g, 29.4 mmol) in THF (226 mL) was added NaH (60% dispersion in mineral oil, 1.410 g, 35.3 mmol) at ambient temperature. The resulting solution was stirred for 10 minutes at which point a solution of 2-(2-(2-(2-azidoethoxy)ethoxy)ethoxy)ethyl methanesulfonate<sup>1</sup> (**S2**, 9.61 g, 32.3 mmol) in THF (45.2 mL) was added, followed by a THF (22.60 mL) wash. The reaction was fitted with a reflux condenser and heated to 60 °C for 12 h. Additional NaH (60% dispersion in mineral oil, 1.410 g, 35.3 mmol) was added and the reaction was stirred at 60 °C for an additional 12h. The reaction was cooled and poured onto ice water and extracted with CH<sub>2</sub>Cl<sub>2</sub> (3 x 300 mL). Combined organics were dried over anhydrous Na<sub>2</sub>SO<sub>4</sub>. Filtration and concentration *in vacuo* provided a crude oil that was purified via silica gel chromatography (gradient 0 to 20% MeOH/CH<sub>2</sub>Cl<sub>2</sub>) to afford **S3** (13.24 g, 90%) as a viscous oil. An analytical sample was purified via reverse phase preparative HPLC (Method A).

**4-(13-azido-2,5,8,11-tetraoxatridecyl)-1-trityl-1H-imidazole (S3):** <sup>1</sup>H NMR (400 MHz, DMSO-*d*<sub>6</sub>) δ ppm 9.07 (s, 1 H), 7.67 (s, 1 H), 6.97 - 7.57 (m, 15 H), 4.55 (s, 2 H), 3.25 - 3.71 (m, 16 H); LC-MS: RT (min) = 5.14; HRMS calculated for C<sub>31</sub>H<sub>36</sub>N<sub>5</sub>O<sub>4</sub> (M + H) 542.2771, found 542.2768.

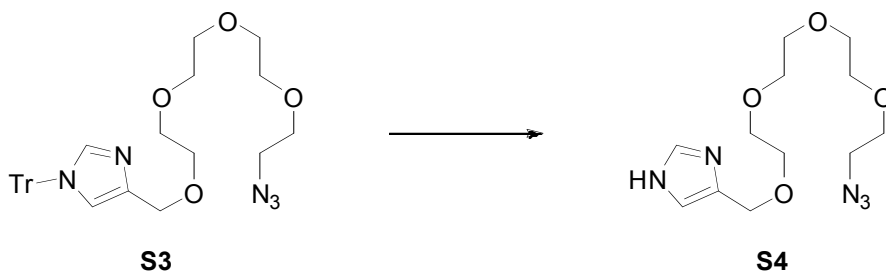

To a solution of 4-(13-azido-2,5,8,11-tetraoxatridecyl)-1-trityl-1H-imidazole (**S3**, 11.1 g, 20.49 mmol) in CH<sub>2</sub>Cl<sub>2</sub> (427 mL) was added TFA (85 mL). The reaction was stirred for 12 h at ambient temperature and was then concentrated *in vacuo*. The crude material was taken up in CH<sub>2</sub>Cl<sub>2</sub> (300 mL) and washed twice with saturated aqueous NaHCO<sub>3</sub>. The organic layer was dried over anhydrous Na<sub>2</sub>SO<sub>4</sub>, filtered and concentrated *in vacuo*. Filtration and concentration *in vacuo* provided a crude oil that was purified via silica gel chromatography (gradient 0 to 30% MeOH/EtOAc) to provide **S4** (5.98 g, 97%) as a clear, viscous oil that solidified upon standing. An analytical sample was purified via reverse phase preparative HPLC (Method A).

**4-(13-azido-2,5,8,11-tetraoxatridecyl)-1H-imidazole (S4):** <sup>1</sup>H NMR (400 MHz, CHLOROFORM-*d*) δ ppm 10.59 (br. s., 1 H), 8.55 (s, 1 H), 7.24 (s, 1 H), 4.63 (s, 2 H), 3.60 - 3.76 (m, 14 H), 3.39 (t, *J* = 5.0 Hz, 2 H); LC-MS: RT (min) = 2.97; HRMS calculated for C<sub>12</sub>H<sub>22</sub>N<sub>5</sub>O<sub>4</sub> (M + H) 300.1666, found 300.1669.

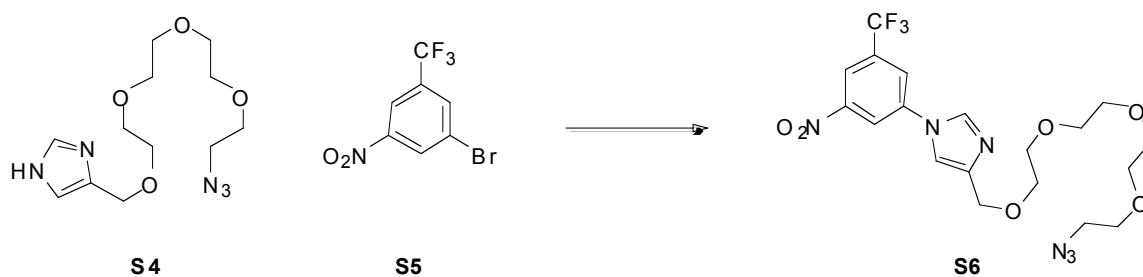

To a suspension of 4-(13-azido-2,5,8,11-tetraoxatridecyl)-1H-imidazole (**S4**, 3.76 g, 12.56 mmol), commercially-available 1-bromo-3-nitro-5-(trifluoromethyl)benzene (**S5**, 2.83 g, 10.47 mmol), and  $K_2CO_3$  (2.60 g, 18.84 mmol) in DMF (6.98 mL) in an oven-dried microwave vial were added ethylenediamine (0.106 mL, 1.570 mmol) and copper(I) iodide (0.199 g, 1.047 mmol). Reaction was capped and heated to 110 °C for 24 h. After cooling, the reaction was diluted in EtOAc (100 mL) and brine (50 mL). The aqueous layer was extracted with EtOAc (3 x 100 mL) and the combined organics were dried over anhydrous  $Na_2SO_4$ . Filtration and concentration *in vacuo* provided a crude oil that was purified via silica gel chromatography (gradient 0 to 20% MeOH/ $CH_2Cl_2$ ) to provide **S6** (3.20 g, 63%) as an orange oil. An analytical sample was purified via reverse phase preparative HPLC (Method A).

**4-(13-azido-2,5,8,11-tetraoxatridecyl)-1-(3-nitro-5-(trifluoromethyl)phenyl)-1H-**

**imidazole (S6):**  $^1H$  NMR (400 MHz,  $CHCl_3-d$ )  $\delta$  ppm 8.57 (s, 2 H), 8.52 (br. s., 1 H), 8.11 (s, 1 H), 7.59 (br. s., 1 H), 4.68 (s, 2 H), 3.75 - 3.81 (m, 2 H), 3.70 - 3.75 (m, 2 H), 3.62 - 3.70 (m, 10 H), 3.36 (t,  $J = 4.99$  Hz, 2 H); LC-MS: RT (min) = 4.59; HRMS calculated for  $C_{19}H_{24}F_3N_6O_6$  (M + H) 489.1718, found 489.1720.

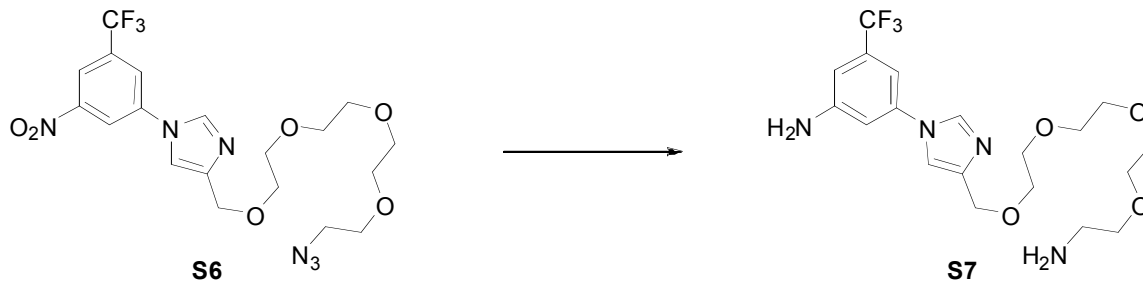

To an oven-dried round-bottom flask under nitrogen were added 4-(13-azido-2,5,8,11-tetraoxatridecyl)-1-(3-nitro-5-(trifluoromethyl)phenyl)-1H-imidazole (**S6**, 1.00 g, 2.047 mmol), anhydrous MeOH (10.24 mL), and Pd(OH)<sub>2</sub> (0.029 g, 0.205 mmol), sequentially. The reaction flask was fitted with a balloon of H<sub>2</sub> and was left to stir at ambient pressure. After 12 h, additional catalyst was added and a new balloon of H<sub>2</sub> was attached. After an additional 12 h, N<sub>2</sub> was bubbled through the solution for 5 min and Celite (~200 mg) and thiol-impregnated silica gel (~200 mg) were added. Filtration through Celite (MeOH wash) and concentration of the filtrate *in vacuo* provided crude **S7** (0.65 g, 74%) that was used in subsequent reactions without further purification. An analytical sample was purified via reverse phase preparative HPLC (Method A).

**1-(1-(3-amino-5-(trifluoromethyl)phenyl)-1H-imidazol-4-yl)-2,5,8,11-**

**tetraoxatridecan-13-amine (**S7**):** <sup>1</sup>H NMR (400 MHz, DMSO-*d*<sub>6</sub>) δ ppm 8.95 (s, 1 H), 7.94 (s, 1 H), 7.90 (br. s, 2 H), 7.11 (s, 1 H), 7.04 (s, 1 H), 6.94 (s, 1 H), 4.50 (s, 2 H), 3.39 - 3.75 (m, 16 H), 2.97 (m, 2 H); LC-MS: RT (min) = 3.24; HRMS calculated for C<sub>19</sub>H<sub>28</sub>F<sub>3</sub>N<sub>4</sub>O<sub>4</sub> (M + H) 433.2057, found 433.2068.

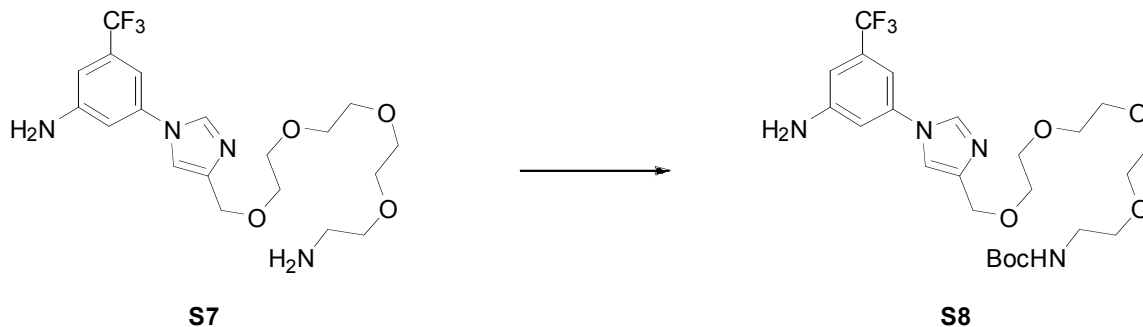

To a solution of 1-(1-(3-amino-5-(trifluoromethyl)phenyl)-1H-imidazol-4-yl)-2,5,8,11-tetraoxatridecan-13-amine (**S7**, 0.600 g, 1.39 mmol) in MeOH (13.9 mL) at ambient temperature were added Et<sub>3</sub>N (0.39 mL, 2.77 mmol) and Boc<sub>2</sub>O (0.34 mL, 1.46 mmol). The reaction was allowed to stir for 4 h and was then diluted in EtOAc (50 mL) and H<sub>2</sub>O (50 mL). The aqueous layer was extracted with EtOAc (3 x 50 mL) and the organic extracts were dried over anhydrous Na<sub>2</sub>SO<sub>4</sub>. Filtration and concentration *in vacuo* provided a crude orange oil that was purified via silica gel chromatography (gradient 0 to 20% MeOH/CH<sub>2</sub>Cl<sub>2</sub>) to provide **S8** (695 mg, 94%) as an orange oil. An analytical sample was purified via reverse phase preparative HPLC (Method A).

**tert-butyl 1-(1-(3-amino-5-(trifluoromethyl)phenyl)-1H-imidazol-4-yl)-2,5,8,11-tetraoxatridecan-13-ylcarbamate (S8):** <sup>1</sup>H NMR (400 MHz, CHLOROFORM-*d*) δ ppm 8.53 (br. s., 1 H), 7.49 (s, 1 H), 6.89 - 7.03 (m, 3 H), 5.14 (br. s., 1 H), 4.69 (s, 2 H), 3.58 - 3.80 (m, 14 H), 3.52 (t, *J* = 5.1 Hz, 2 H), 3.29 (br. s., 2 H), 1.43 (s, 9 H); LC-MS: RT (min) = 4.48; HRMS calculated for C<sub>24</sub>H<sub>36</sub>F<sub>3</sub>N<sub>4</sub>O<sub>6</sub> (M + H) 533.2604, found 533.2603.

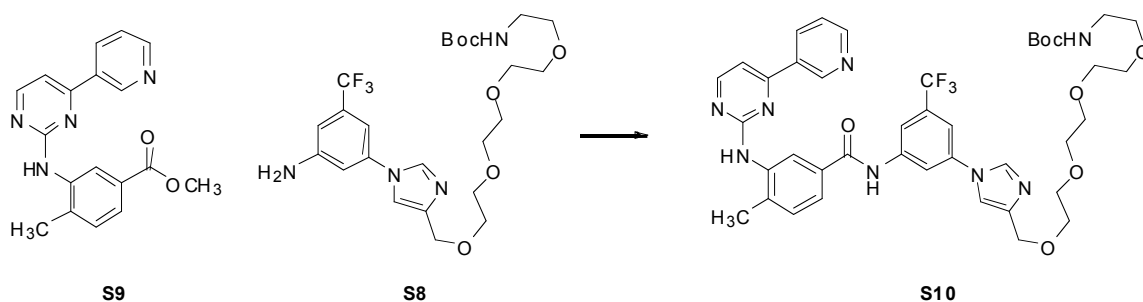

To an oven dried round-bottom flask equipped with a stir bar were added tert-butyl 1-(1-(3-amino-5-(trifluoromethyl)phenyl)-1H-imidazol-4-yl)-2,5,8,11-tetraoxatridecan-13-ylcarbamate (**S8**, 0.033 g, 0.062 mmol), THF (0.416 mL) and methyl 4-methyl-3-(4-(pyridin-3-yl)pyrimidin-2-ylamino)benzoate<sup>2</sup> (**S9**, 0.020 g, 0.062 mmol), sequentially. ~20 mg of 4Å molecular sieves were added and mixture was allowed to stir for 15 min at ambient temperature before being cooled to 0 °C. Potassium *tert*-butoxide (0.039 g, 0.343 mmol) was added in a single portion and the reaction was allowed to return to ambient temperature. After 4 h, brine (2 mL) was added and the aqueous layer was extracted with EtOAc (3 x 10 mL). The combined organic extracts were washed with brine (2 x 10 mL) and water (2 x 10 mL) and then dried over anhydrous Na<sub>2</sub>SO<sub>4</sub>. Filtration and concentration *in vacuo* provided a crude orange oil that was purified via reverse phase preparative HPLC (Method B) to provide **S10** (5.4 mg, 10.5%) as a fluffy pale orange powder.

**tert-butyl 1-(1-(3-(4-methyl-3-(4-(pyridin-3-yl)pyrimidin-2-ylamino)benzamido)-5-(trifluoromethyl)phenyl)-1H-imidazol-4-yl)-2,5,8,11-tetraoxatridecan-13-ylcarbamate (**S10**):** <sup>1</sup>H NMR (400 MHz, CHLOROFORM-*d*) δ ppm 9.31 (s, 1 H), 8.97 (br. s., 1 H), 8.84 (s, 1 H), 8.70 (d, *J* = 3.9 Hz, 1 H), 8.54 (d, *J* = 5.3 Hz, 1 H), 8.39 (d, *J* = 8.0 Hz, 1 H), 8.19 (s, 1 H), 8.05 (s, 1 H), 7.95 (s, 1 H), 7.66 (d, *J* = 7.8 Hz, 1 H), 7.38 -

7.45 (m, 2 H), 7.33 - 7.38 (m, 2 H), 7.19 - 7.25 (m, 2 H), 5.19 (br. s., 1 H), 4.59 (s, 2 H), 3.54 - 3.83 (m, 14 H), 3.49 (t,  $J = 5.1$  Hz, 2 H), 2.44 (s, 3 H), 1.37 - 1.49 (m, 9 H); LC-MS: RT (min) = 4.72; HRMS calculated for  $C_{41}H_{48}F_3N_8O_7$  ( $M + H$ ) 821.3593, found 821.3593.

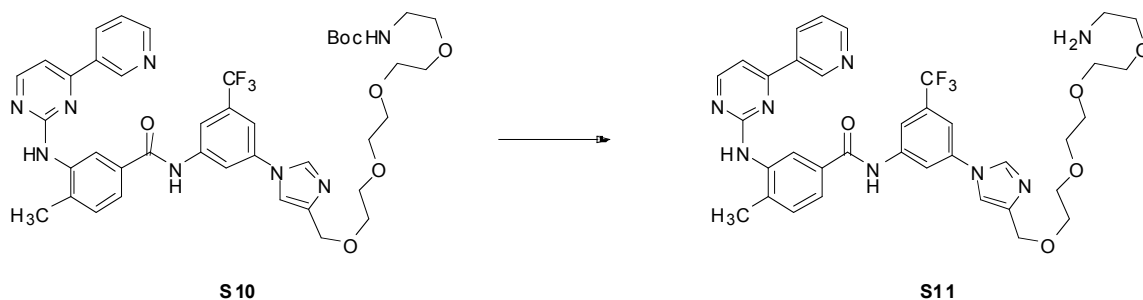

To a solution of tert-butyl 1-(1-(3-(4-methyl-3-(4-(pyridin-3-yl)pyrimidin-2-ylamino)benzamido)-5-(trifluoromethyl)phenyl)-1H-imidazol-4-yl)-2,5,8,11-tetraoxatridecan-13-ylcarbamate (**S10**, 0.005 g, 6.09  $\mu$ mol) in  $CH_2Cl_2$  (0.609 mL) at ambient temperature was added TFA (9.39  $\mu$ L, 0.122 mmol). After 2 h, additional TFA (9.39  $\mu$ L, 0.122 mmol) was added and the reaction was allowed to stir an additional 3 h. The reaction was concentrated *in vacuo* to provide **S11** (4.2 mg, 96%) as an orange oil that was used in subsequent reactions without further purification. An analytical sample was purified via reverse phase preparative HPLC (Method A).

**N-(3-(4-(13-amino-2,5,8,11-tetraoxatridecyl)-1H-imidazol-1-yl)-5-(trifluoromethyl)phenyl)-4-methyl-3-(4-(pyridin-3-yl)pyrimidin-2-ylamino)benzamide (S11):**  $^1H$  NMR (400 MHz,  $DMSO-d_6$ )  $\delta$  ppm 10.78 (s, 1 H), 9.31 (br. s., 1 H), 9.25 (s, 1 H), 9.21 (s, 1 H), 8.73 (d,  $J = 4.11$  Hz, 1 H), 8.49 - 8.62 (m, 2 H), 8.33 (s, 1 H), 8.23 (s, 1 H), 8.12 (s, 1 H), 7.90 (s, 1 H), 7.76 - 7.84 (m, 2 H), 7.61 (dd,  $J =$



7.83, 4.89 Hz, 1 H), 7.41 - 7.54 (m, 2 H), 4.56 (s, 2 H), 3.43 - 3.70 (m, 16 H), 2.88 - 3.04 (m, 2 H), 2.36 (s, 3 H); LC-MS: RT (min) = 3.86; HRMS calculated for C<sub>36</sub>H<sub>40</sub>F<sub>3</sub>N<sub>8</sub>O<sub>5</sub> (M + H) 721.3091, found 721.3090.

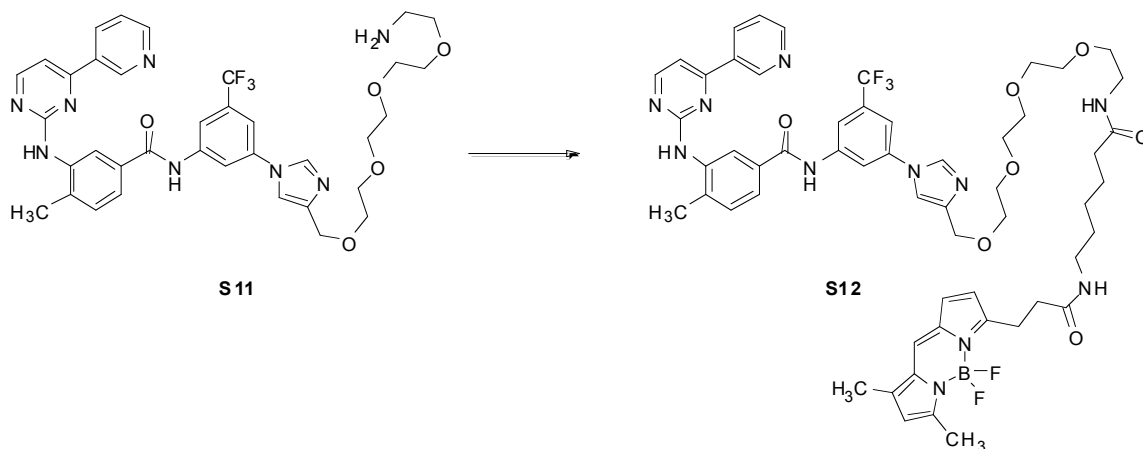

A solution of 6-((4,4-difluoro-5,7-dimethyl-4-bora-3a,4a-diaza-s-indacene-3-propionyl)amino)hexanoic acid, succinimidyl ester (BODIPY® FL-X, SE, 5.0 mg, 11 μmol) in DMF (0.2 mL) was added to a solution of N-(3-(4-(13-amino-2,5,8,11-tetraoxatridecyl)-1H-imidazol-1-yl)-5-(trifluoromethyl)phenyl)-4-methyl-3-(4-(pyridin-3-yl)pyrimidin-2-ylamino) benzamide (**S12**, 8.0 mg, 9.95 μmol) in DMF (0.2 mL) in a foil-covered vial. The reaction solution was stirred at room temperature for 20 minutes, followed by immediate purification via reverse phase preparative HPLC (Method A) to provide **S12** (5.0 mg, 42%).

**5,5-difluoro-7,9-dimethyl-3-(1-(1-(3-(4-methyl-3-(4-(pyridin-3-yl)pyrimidin-2-ylamino)benzamido)-5-(trifluoromethyl)phenyl)-1H-imidazol-4-yl)-15,22-dioxo-2,5,8,11-tetraoxo-14,21-diazatetracosan-24-yl)-5H-dipyrrolo[1,2-c:1',2'-f][1,3,2]diazaborinin-4-ium-5-uide** (**S12**, BODIPY® FL Tassigna): <sup>1</sup>H NMR (d<sub>6</sub>-DMSO,

400 MHz)  $\delta$  10.73 (s, 1H), 9.29 (s, 1H), 9.19 (app. s, 2H), 8.70 (d,  $J = 3.91$  Hz, 1H), 8.55 (d,  $J = 5.09$  Hz, 1H), 8.52 (s, 1H), 8.49 (dd,  $J = 8.02, 1.76$  Hz, 1H), 8.32 (s, 1H), 8.22 (s, 1H), 8.09 (s, 1H), 7.85-7.90 (m, 2H), 7.76-7.81 (m, 2H), 7.67 (s, 1H), 7.55 (dd,  $J = 8.02, 4.89$  Hz, 1H), 7.49 (d,  $J = 5.09$  Hz, 1H), 7.46 (d,  $J = 8.22$  Hz, 1H), 7.07 (d,  $J = 3.91$  Hz, 1H), 6.32 (d,  $J = 3.91$  Hz, 1H), 6.28 (s, 1H), 4.54 (s, 2H), 3.60-3.64 (m, 2H), 3.55-3.58 (m, 2H), 3.47-3.52 (m, 8H), 3.36 (t,  $J = 6.06$  Hz, 2H), 3.16 (q,  $J = 5.87$  Hz, 2H), 3.00-3.08 (m, 4H), 2.43-2.47 (app. t, 2H), 2.45 (s, 3H), 2.36 (s, 3H), 2.25 (s, 3H), 2.03 (t,  $J = 7.43$  Hz, 2H), 1.45 (q,  $J = 7.43$  Hz, 2H), 1.36 (q,  $J = 7.43$  Hz, 2H), 1.24-1.18 (m, 2H); LC-MS: RT (min) = 5.08;  $[M/2]^+$  554.5; HRMS calculated for  $C_{56}H_{64}BF_5N_{11}O_7$  (M + H) 1108.4925, found 1108.4961.

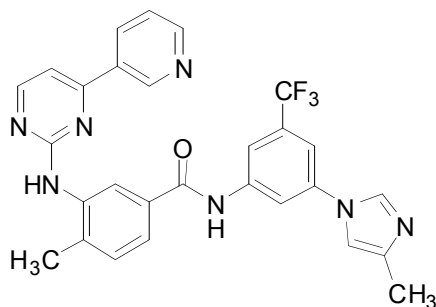

**S13**

The synthesis of Tassigna (**S13**) was accomplished according to published methods.<sup>2</sup>

**4-methyl-N-(3-(4-methyl-1H-imidazol-1-yl)-5-(trifluoromethyl)phenyl)-3-(4-(pyridine-3-yl)pyrimidin-2-ylamino)benzamide (S13, Tassigna, AMN-107):**  $^1H$  NMR (d<sub>6</sub>-DMSO, 400 MHz)  $\delta$  10.61 (s, 1H), 9.28 (d,  $J = 1.57$  Hz, 1H), 9.16 (s, 1H), 8.67 (d,  $J = 3.52$  Hz, 1H), 8.54 (d,  $J = 5.48$  Hz, 1H), 8.44 (ddd,  $J = 8.22, 1.96, 1.57$  Hz, 1H), 8.32 (d,  $J = 1.96$  Hz, 1H), 8.29 (t,  $J = 1.96$  Hz, 1H), 8.20 (s, 1H), 8.15 (s, 1H), 7.76 (dd,  $J = 7.83, 1.57$  Hz, 1H), 7.71 (s, 1H), 7.45-7.53 (m, 4H), 2.36 (s, 3H), 2.17 (s, 3H); LC-MS:

RT (min) = 4.27; [M + H]<sup>+</sup> 530.0; HRMS calculated for C<sub>28</sub>H<sub>23</sub>F<sub>3</sub>N<sub>7</sub>O (M + H) 530.1838, found 530.1917.

References:

- 1) Svedhem, S.; Hollander, C.-A.; Shi, J.; Konradsson, P.; Liedberg, B.; Svensson, S. C. *T. J. Org. Chem.* **2001**, *66*, 4494–4503.
- 2) Wei-Sheng, H., and William, C. S. (2007) An Efficient Synthesis of Nilotinib (AMN107), *Synthesis 14*, 2121–2124.

## Analytical trace demonstrating purity of Bodipy FL Tassigna:

Instrument: INSTRUMENT 1 Datafile: H:\INSTR\AG02RAW\SKOUMBO\06-08\130608-APS-AMN-BODIPY1-02088.D

File ..KOUMBO\06-08\130608-APS-AMN-BODIPY1-02088.D Tgt Mass (EZX) : 1107.00;553.00  
 Injection Date : 13 Jun 08 9:27 pm -0800 Seq. Line : 0  
 Sample Name : APS-AMN-BODIPY Location : Vial 26  
 Acq. Operator : AMANDA SKOUMBOURDIS Inj : 1  
 Spec. Reported : UV Integration Inj Volume : 2 ul  
 Acq. Method : C:\Chem32\1\METHODS\FINAL\_GRAD.M  
 Analysis Method : C:\Chem32\1\METHODS\DEF\_LC1.M  
 Sample Info : 1107.00, 553.00  
 Method Info :

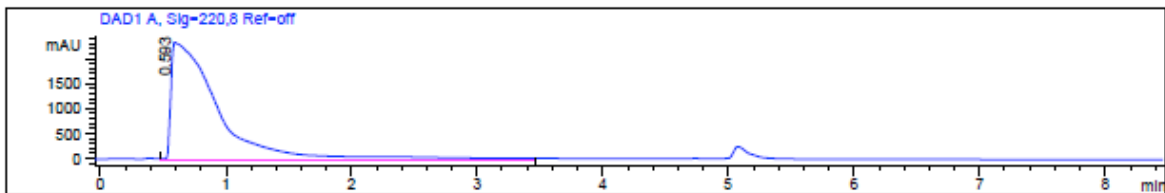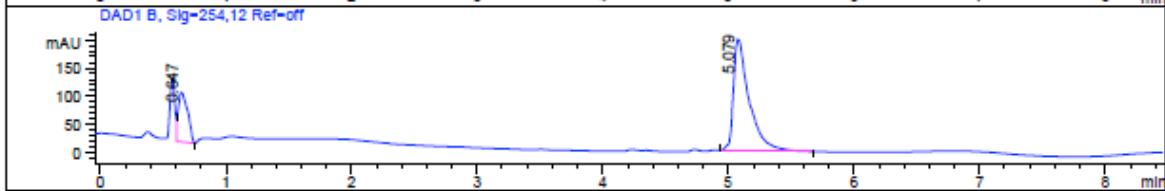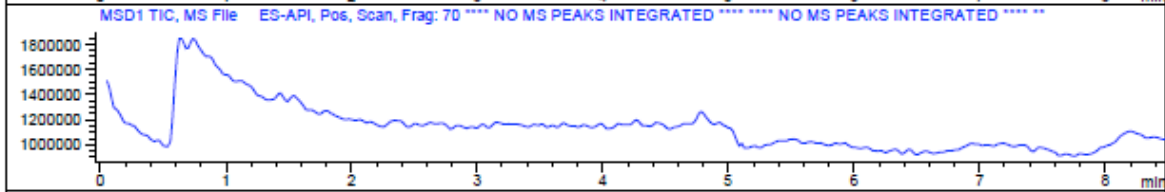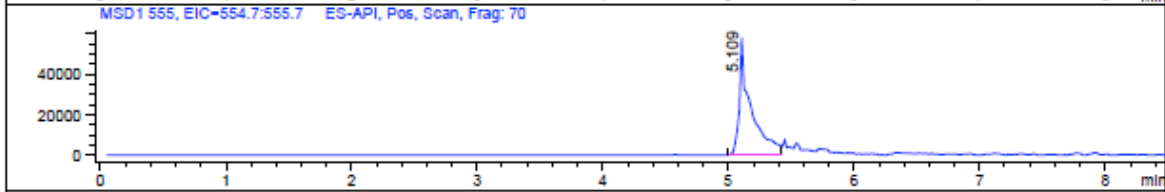

Integration Results for DAD1 A, Sig=220.8 Ref-off

| RetTim | Width | Area     | Height  | Area%  | MS(+) |
|--------|-------|----------|---------|--------|-------|
| 0.59   | 0.31  | 60557.82 | 2350.47 | 100.00 | 157   |

Integration Results for DAD1 B, Sig=254.12 Ref-off

| RetTim | Width | Area    | Height | Area% | MS(+) |
|--------|-------|---------|--------|-------|-------|
| 0.65   | 0.08  | 456.55  | 87.85  | 20.22 | 157   |
| 5.08   | 0.13  | 1801.23 | 200.18 | 79.78 | 157   |

Ret. Time: 0.59 <<<< POSITIVE SPECTRA >>>>

Ret. Time: 0.65

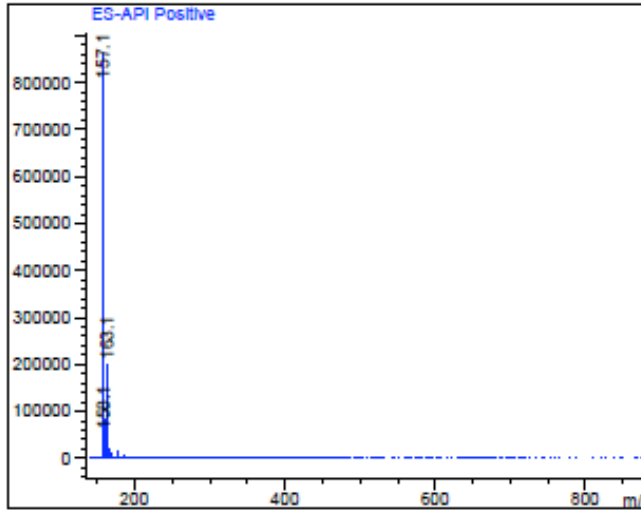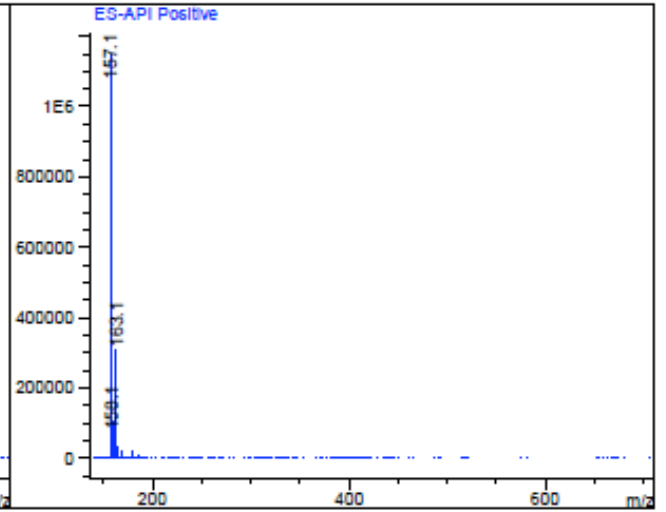

Ret. Time: 5.08

Ret. Time: 0.59 <<<< POSITIVE SPECTRA >>>>

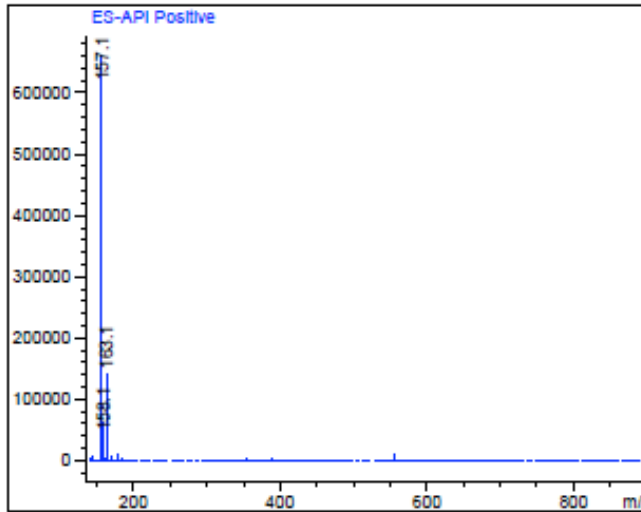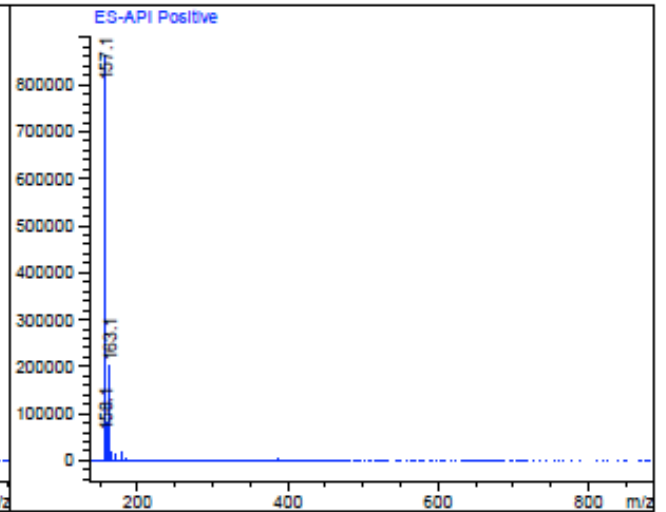

Ret. Time: 0.65

Ret. Time: 5.08

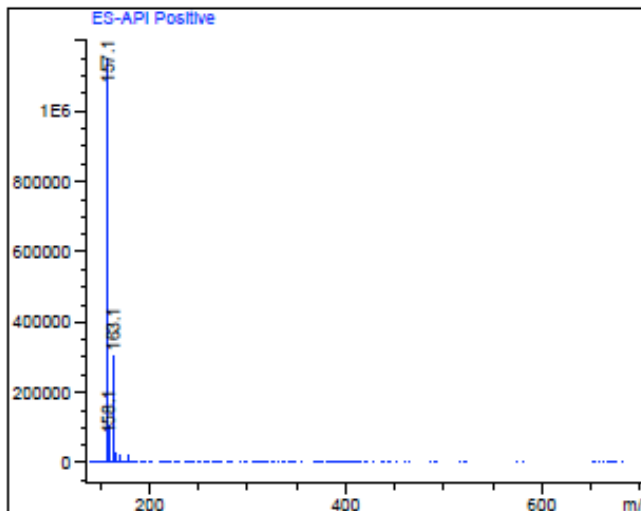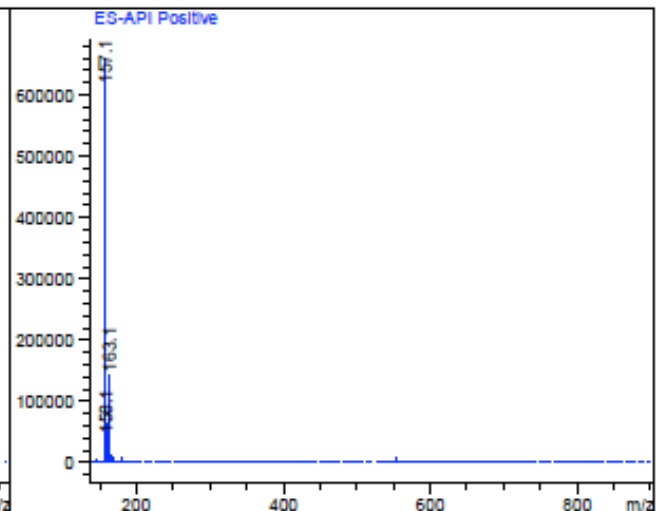

Supplement: NIHMS302553-supplement-Supplementary_Material.pdf [file NIHMS302553-supplement-Supplementary_Material.pdf]
